# Supplementary material
Source: PubMed Central journal article supplement (PMC4135604)
Supplement: MCB.01710-13_zmb999100546so1.pdf [file MCB.01710-13_zmb999100546so1.pdf]

# SUPPLEMENTAL FIGURES AND TABLES

Fig.S1

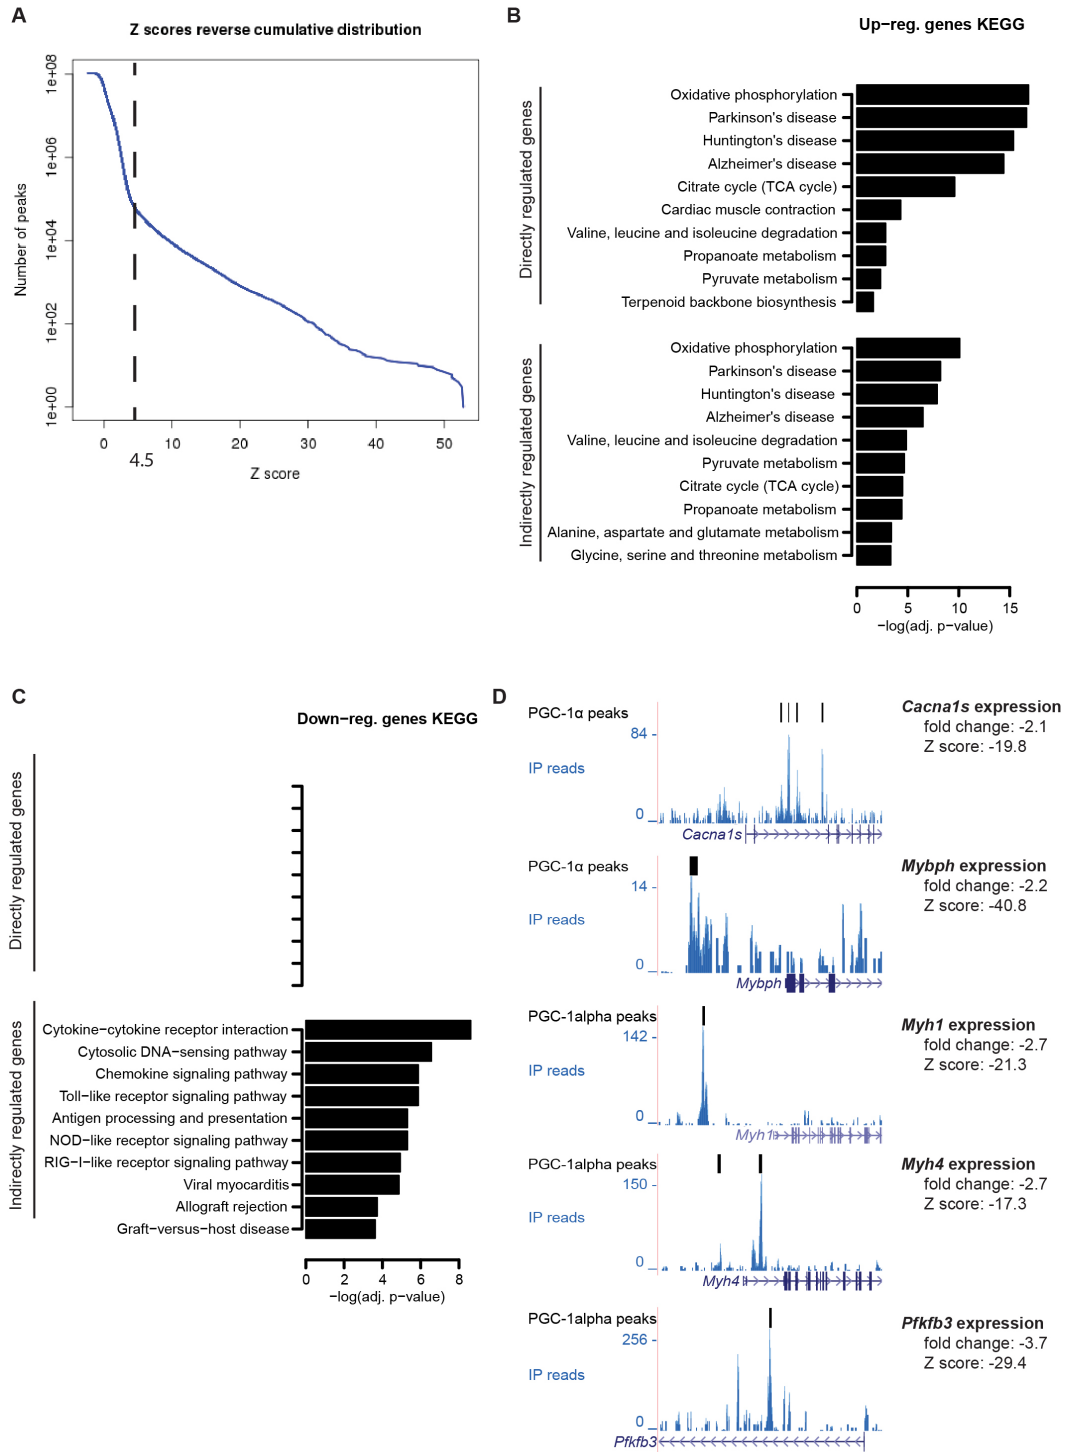

Suppl. Fig. S1. Peak Z score distribution and KEGG functional analysis. Related to Figure 1.

(A) Distribution of the Z scores for all sliding windows considered by the peak-finding algorithm along the mouse genome. The chosen cutoff for peak calling is depicted by the dotted line.

(B) Subset of the top significantly enriched KEGG terms identified for direct and indirect up-regulated PGC-1 $\alpha$  target genes.

(C) Subset of the top significantly enriched KEGG terms identified for direct and indirect down-regulated PGC-1 $\alpha$  target genes.

(D) ChIP-Seq signal around the promoter region of the five directly down-regulated genes (*Cacna1s*, *Mybph*, *Myh1*, *Myh4*, *Pfkfb3*) involved in regulating the contractile properties of fast-twitch muscle fibers.

Fig.S2

A

| Motif name                                                             | Z<br>direct | Z<br>indirect | Z avg.<br>direct | Z avg.<br>indirect | Directly<br>activated | Indirectly<br>activated | Directly<br>repressed | Indirectly<br>repressed |
|------------------------------------------------------------------------|-------------|---------------|------------------|--------------------|-----------------------|-------------------------|-----------------------|-------------------------|
| <b>Group 1: motifs only directly activated by PGC-1alpha</b>           |             |               |                  |                    |                       |                         |                       |                         |
| SP1.p2                                                                 | 3.99        | 0.61          | 9.76             | 0.33               | 1                     | 0                       | 0                     | 0                       |
| ELF1,2,4.p2                                                            | 3.11        | 1.32          | 7.59             | 3.13               | 1                     | 0                       | 0                     | 0                       |
| PAX4.p2                                                                | 2.50        | 1.53          | 6.11             | -3.68              | 1                     | 0                       | 0                     | 0                       |
| LMO2.p2                                                                | 2.36        | 1.65          | 5.78             | 3.98               | 1                     | 0                       | 0                     | 0                       |
| HNF4A_NR2F1,2.p2                                                       | 2.26        | 1.54          | 5.52             | 3.64               | 1                     | 0                       | 0                     | 0                       |
| GTF21.p2                                                               | 2.09        | 2.38          | 5.10             | -5.80              | 1                     | 0                       | 0                     | 1                       |
| <b>Group 2: motifs directly and indirectly activated by PGC-1alpha</b> |             |               |                  |                    |                       |                         |                       |                         |
| ESRRA.p2                                                               | 6.04        | 15.49         | 14.78            | 37.94              | 1                     | 1                       | 0                     | 0                       |
| NR5A1,2.p2                                                             | 3.53        | 7.73          | 8.66             | 17.00              | 1                     | 1                       | 0                     | 0                       |
| ZNF143.p2                                                              | 2.48        | 4.65          | 6.05             | 9.68               | 1                     | 1                       | 0                     | 0                       |
| NFY{A,B,C}.p2                                                          | 2.37        | 3.56          | 5.80             | 7.62               | 1                     | 1                       | 0                     | 0                       |
| ESR1.p2                                                                | 2.33        | 4.53          | 5.69             | 11.04              | 1                     | 1                       | 0                     | 0                       |
| RXR{A,B,G}.p2                                                          | 2.29        | 4.30          | 5.59             | 10.50              | 1                     | 1                       | 0                     | 0                       |
| <b>Group 3: motifs only indirectly activated by PGC-1alpha</b>         |             |               |                  |                    |                       |                         |                       |                         |
| NRF1.p2                                                                | 1.60        | 4.61          | 3.91             | 6.21               | 0                     | 1                       | 0                     | 0                       |
| YY1.p2                                                                 | 0.88        | 2.97          | 2.09             | 5.77               | 0                     | 1                       | 0                     | 0                       |
| EHF.p2                                                                 | 0.73        | 2.77          | 1.77             | 6.35               | 0                     | 1                       | 0                     | 0                       |
| RXRA_VDR{dimer}.p2                                                     | 0.71        | 2.54          | 1.71             | 6.20               | 0                     | 1                       | 0                     | 0                       |
| HES1.p2                                                                | 0.34        | 2.52          | 0.84             | 6.10               | 0                     | 1                       | 0                     | 0                       |
| FOXO1,3,4.p2                                                           | 0.46        | 2.51          | 1.13             | 6.12               | 0                     | 1                       | 0                     | 0                       |
| ELK1,4_GABP{A,B1}.p3                                                   | 1.18        | 2.46          | 2.89             | 5.95               | 0                     | 1                       | 0                     | 0                       |
| NKX3-1.p2                                                              | 0.60        | 2.43          | 1.48             | 5.93               | 0                     | 1                       | 0                     | 0                       |
| REST.p3                                                                | 0.48        | 2.41          | 1.15             | 5.70               | 0                     | 1                       | 0                     | 0                       |
| NFE2L1.p2                                                              | 1.79        | 2.32          | 4.36             | 5.23               | 0                     | 1                       | 0                     | 0                       |
| POU5F1_SOX2{dimer}.p2                                                  | 0.24        | 2.32          | 0.57             | 5.65               | 0                     | 1                       | 0                     | 0                       |
| AIRE.p2                                                                | 0.38        | 2.24          | -0.91            | 5.40               | 0                     | 1                       | 0                     | 0                       |
| RXRG_dimer.p3                                                          | 1.67        | 2.01          | 4.09             | 4.89               | 0                     | 1                       | 0                     | 0                       |
| <b>Group 4: motifs only indirectly repressed by PGC-1alpha</b>         |             |               |                  |                    |                       |                         |                       |                         |
| IRF1,2,7.p3                                                            | 1.77        | 24.23         | 4.34             | -14.48             | 0                     | 0                       | 0                     | 1                       |
| NFKB1_REL_RELTA.p2                                                     | 0.50        | 6.54          | 1.19             | -16.01             | 0                     | 0                       | 0                     | 1                       |
| TLX1.3_NFIC{dimer}.p2                                                  | 0.84        | 4.91          | -2.05            | -11.97             | 0                     | 0                       | 0                     | 1                       |
| STAT2,4,6.p2                                                           | 0.35        | 4.81          | 0.52             | -9.67              | 0                     | 0                       | 0                     | 1                       |
| DMAP1_NCOR{1,2}_SMARC.p                                                | 0.25        | 4.22          | -0.60            | -8.73              | 0                     | 0                       | 0                     | 1                       |
| RUNX1..3.p2                                                            | 0.09        | 3.94          | 0.11             | -9.61              | 0                     | 0                       | 0                     | 1                       |
| NFATC1..3.p2                                                           | 0.16        | 3.46          | -0.24            | -8.42              | 0                     | 0                       | 0                     | 1                       |
| GATA1..3.p2                                                            | 1.21        | 3.39          | -2.92            | -8.04              | 0                     | 0                       | 0                     | 1                       |
| TBP.p2                                                                 | 1.11        | 3.20          | 2.71             | -4.04              | 0                     | 0                       | 0                     | 1                       |
| ZIC1..3.p2                                                             | 0.20        | 2.99          | -0.46            | -7.24              | 0                     | 0                       | 0                     | 1                       |
| ATF6.p2                                                                | 0.24        | 2.97          | -0.51            | -7.25              | 0                     | 0                       | 0                     | 1                       |
| TLX2.p2                                                                | 0.57        | 2.86          | 1.37             | -6.76              | 0                     | 0                       | 0                     | 1                       |
| TFAP2B.p2                                                              | 1.75        | 2.72          | 4.26             | -6.61              | 0                     | 0                       | 0                     | 1                       |
| SPI1.p2                                                                | 1.69        | 2.70          | 4.14             | -6.19              | 0                     | 0                       | 0                     | 1                       |
| MEF2{A,B,C,D}.p2                                                       | 0.97        | 2.67          | 2.35             | -6.51              | 0                     | 0                       | 0                     | 1                       |
| TFCP2.p2                                                               | 1.07        | 2.62          | 2.57             | -5.80              | 0                     | 0                       | 0                     | 1                       |
| BPTF.p2                                                                | 1.38        | 2.56          | 3.37             | -6.25              | 0                     | 0                       | 0                     | 1                       |
| LEF1_TCF7_TCF7L1,2.p2                                                  | 0.17        | 2.55          | 0.37             | -6.11              | 0                     | 0                       | 0                     | 1                       |
| STAT1,3.p3                                                             | 0.74        | 2.53          | 1.79             | -6.17              | 0                     | 0                       | 0                     | 1                       |
| RREB1.p2                                                               | 1.56        | 2.39          | 3.82             | -5.42              | 0                     | 0                       | 0                     | 1                       |
| GTF21.p2                                                               | 2.09        | 2.38          | 5.10             | -5.80              | 1                     | 0                       | 0                     | 1                       |
| MYFfamily.p2                                                           | 0.36        | 2.38          | 0.79             | -5.12              | 0                     | 0                       | 0                     | 1                       |
| ZNF384.p2                                                              | 0.64        | 2.34          | -1.55            | -5.27              | 0                     | 0                       | 0                     | 1                       |
| TGIF1.p2                                                               | 0.57        | 2.34          | 1.34             | -5.68              | 0                     | 0                       | 0                     | 1                       |
| TEAD1.p2                                                               | 0.99        | 2.23          | -2.43            | -5.43              | 0                     | 0                       | 0                     | 1                       |
| SOX{8,9,10}.p2                                                         | 0.16        | 2.17          | 0.30             | -5.28              | 0                     | 0                       | 0                     | 1                       |
| CEBPA,B_DDIT3.p2                                                       | 1.03        | 2.13          | 2.51             | -5.20              | 0                     | 0                       | 0                     | 1                       |
| MYOD1.p2                                                               | 1.49        | 2.05          | 3.65             | -4.99              | 0                     | 0                       | 0                     | 1                       |

**Suppl. Fig. S2. Motif activities clustered by Z score in direct/indirect activation/repression.**

**Related to Figure 2.**

(A) Motifs showing different types of regulation (1=yes, 0=not).

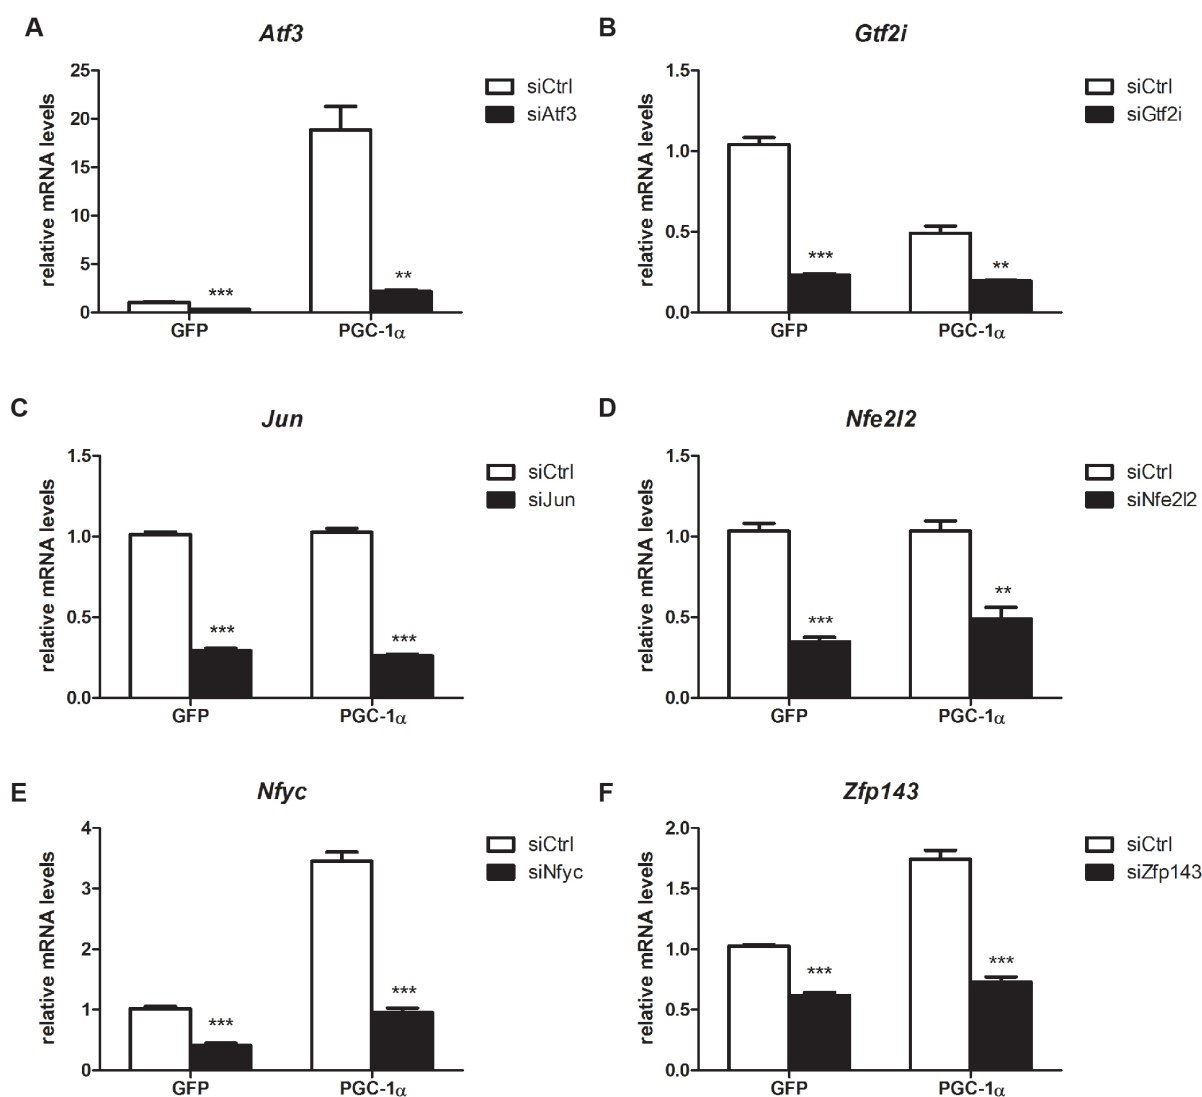

**Suppl. Fig. S3. siRNA knockdown efficiency for the putative PGC-1 $\alpha$  partner TFs. Related to Figure 4**

(A-F) siRNA knockdown efficiency for ATF3 (A), GTF2I (B), JUN (C), NFE2L2 (D), NFYC (E) and ZFP143 (F) knockdown. Bars represent fold change over GFP/siCtrl levels. Error bars represent SEM. \* $p < 0.05$ ; \*\* $p < 0.01$ ; \*\*\* $p < 0.001$ .

**Suppl. Table 1. Real-time primer sequences.** Semiquantitative real-time PCR primers used for validation experiments.

| <b>Real-time PCR primers used for testing the efficiency of the ChIP</b> |                          |                          |
|--------------------------------------------------------------------------|--------------------------|--------------------------|
| Gene promoter or intron                                                  | Forward primer           | Reverse primer           |
| <i>Tbp</i> intron                                                        | TGTGAGCTCCTTGCTTTTT      | ATAGTTGCCAGCAATCAGG      |
| promoter of <i>Aco2</i>                                                  | CACCGATAGTTGCTTTCCAGATAC | AACCATCTGACAGGCATAGTCAAT |
| promoter of <i>Cyca</i>                                                  | AAGGGCGCCCTCTGGGCACATC   | ATCCCCGTCGCGCCTCACCG     |
| promoter of <i>Acadm</i>                                                 | CCTTGCCCGAGCCTAAAC       | GTCTGGCTGCGCCCTCT        |
| promoter of <i>Atp5b</i>                                                 | CTGGAAACTTCCACCCTCACTA   | GAGAGGTTTTTGGCGGAACTA    |
| promoter of <i>Idh3a</i>                                                 | GGACGGCGTCAAGGTCAAG      | GCCTAGGTGGCCTGTCTGTG     |
| <i>PGC-1α</i> exon 2                                                     | TGAGGACCAGCCTCTTTGCC A   | CGCTACACCACTTCAATCCACCC  |

| Gene or gene promoter      | Forward + reverse primer   | FOS binding site          | Peak position             |
|----------------------------|----------------------------|---------------------------|---------------------------|
| <i>TGFβ1</i> <sup>*1</sup> | F: TTTGAGACTTTTCCGCTGCT    | chr7:26472349-26472356    | (see reference 1)         |
|                            | R: GGTCCTGCCTCCTTGCGA      |                           |                           |
| <i>Nr0b2</i> promoter      | F: GGTACAGCCTGGGTTAATGAC   | chr4:133109008-133109015  | chr4:133108962-133109162  |
|                            | R: ACTGCCTGGATGCCCTTAT     |                           |                           |
| <i>Gprc5a</i> promoter     | F: TGATGTCATGAGCCTCACCC    | chr6:135011471-135011478  | chr6: 135011398-135011598 |
|                            | R: TAGCTGTCATTGAGGGCACT    |                           |                           |
| <i>Dbt</i> promoter        | F: AAGGGGCAAAGCAATTCAGG    | chr3: 116215241-116215248 | chr3: 116215152-116215352 |
|                            | R: CTTAGAAAATGTGGTCAGATGCA | chr3: 116215242-116215249 | chr3: 116215152-116215352 |

| <b>Real-time PCR primers used for testing the knockdown efficiency by siRNAs</b> |                       |                      |
|----------------------------------------------------------------------------------|-----------------------|----------------------|
| Gene                                                                             | Forward primer        | Reverse primer       |
| <i>Rn18s</i>                                                                     | AGTCCCTGCCCTTTGTACACA | CGATCCGAGGGCCTCACTA  |
| <i>Fos</i>                                                                       | TACTACCATTCCCAGCCGA   | GCTGTCACCGTGGGGATAAA |
| <i>Jun</i>                                                                       | TGGGCACATCACCCTACAC   | TCTGGCTATGCAGTTCAGCC |
| <i>Atf3</i>                                                                      | TCTGCGCTGGAGTCAGTTAC  | CCGCTCCTTTTCTCTCAT   |
| <i>Gtf2i</i>                                                                     | TTCGAAGGCTTTGCAAGGAAG | TTCGGGGTCTCACTGGTTT  |
| <i>Nfe2l2</i>                                                                    | AGTGGATCCGCCAGCTACTC  | ATGGGAATGTCTCTGCCAAA |
| <i>Nfyc</i>                                                                      | CCACCAGTTCTACGACCACC  | GGCCTGTACAATCTGCACCT |
| <i>Zfp143</i>                                                                    | GTGGTCGGTCTTTACCACA   | AAATGCCCTCCACATCCAG  |

| <b>Real-time primers used for target gene validation</b> |                       |                      |
|----------------------------------------------------------|-----------------------|----------------------|
| Gene                                                     | Forward primer        | Reverse primer       |
| <i>Aim1l</i>                                             | CCTGTTGCGTCCATAAGGGT  | GCTCTGAGTTCCACATCCCC |
| <i>Atp1b1</i>                                            | GCTACGAGGCCTACGTGCTA  | TGCCACAGTCTCGAAAATC  |
| <i>Atp5g1</i>                                            | CAGAGGCCCATCTAAGCAG   | TGTCCCGGGAAATGACACTG |
| <i>Cdk15</i>                                             | ATGCAGTTGCTACCACCGTT  | CCGTGGAAGTGGATGCTTCT |
| <i>Cdr2l</i>                                             | GGAACAGGAAAACGAACGGC  | ACCACCGTGTACTCAGTTC  |
| <i>Crb3</i>                                              | CCGGACCCTTTCACAAATAGC | CTCTGTCTGCCGCTTTTCC  |

|                                |                       |                        |
|--------------------------------|-----------------------|------------------------|
| <i>Dot1l</i>                   | TGACCTCAGATGAGGAGCCA  | TGTCTTCGGGGGAGATTTGC   |
| <i>Eef1a2</i>                  | CAAGATGGACTCCACGGAAC  | CTGGGTTGTAGCCGATCTTC   |
| <i>Eif2b4</i>                  | ACGGCAAGACCCAATCAGAG  | AAGTTCTGCCTTACTCCGGC   |
| <i>Fa2h</i>                    | GTGGACTGGCAGAAACCTCT  | TCTGAGTGGAAGAGGCGAAT   |
| <i>Fabp3</i>                   | CATGTGCAGAAGTGGAACGG  | CTCACCACACTGCCATGAGT   |
| <i>Fam131c</i>                 | CTGGCTACGTCATCCCTTGT  | TCCAGCCTTTCCACTCGAT    |
| <i>Gabpa</i>                   | GTCGAGGTGGTCATCGATCC  | GTAATGTGCTTGGTGCCGTC   |
| <i>Gdf15</i>                   | CACGCATGCGCAGATCAAAG  | TGTGCATAAGAACCACCGGG   |
| <i>Gtpbp2</i>                  | TGGAAACCTCAAAGCTCGGG  | GTACGGAGGGTTGTTGGCTT   |
| <i>Il1a</i>                    | TGCAAGCTATGGCTCACTTC  | GATACTGTCACCCGGCTCTC   |
| <i>Inpp5j</i>                  | ACAAGGGCGGAGTAAGTGTG  | TGAAAGTTATCCTTGCCTGT   |
| <i>Jam2</i>                    | GTATTACTGCGAAGCCCGGA  | CAACCGTTGCTATGATGCCG   |
| <i>Kdm5a</i>                   | GTCTTCCGTGTGTCATCAGC  | TTAGTCGGGGCAATTCAGGT   |
| <i>Ldhb</i>                    | GACTCCGAAAATTGTGGCCG  | TTCTCTGCACCAGTTGAGC    |
| <i>Lpin1</i>                   | CGGCCCTCAACACCAAAAAG  | AATTCACCCACAGCCAGAG    |
| <i>Lrrc2</i>                   | GTGGAAGGAGCTGCCTGATT  | AACAGCTCGATGTACGTGGG   |
| <i>Met</i>                     | GCTGAGAACTCTTCCGGCT   | AGCCGGCCCATGAATAAGTC   |
| <i>Ndufa9</i>                  | TTCTGTGGCTCATCCCATCG  | TGTAGCCCCAAACACAGTGG   |
| <i>Nmnat1</i>                  | GGTCGGTGATGCGTACAAGA  | CCACGTATCCACTTCCACCC   |
| <i>Nppb</i>                    | GGCCTCACAAAAGAACACCC  | TGCCCAAAGCAGCTTGAGAT   |
| <i>Nr0b2</i>                   | CCTCTTCAACCCAGATGTGC  | GGGCTCCAAGACTTCACACA   |
| <i>Osbp1a</i>                  | TCCCCAATCAGTGCATTCC   | GCTTCTACACTCTTGCCCCA   |
| <i>Qrs1</i>                    | GTTGGATCAGGGTGCCCTAC  | GGGGTTTCTAACTGGCCCAA   |
| <i>Rasl10b</i>                 | AGACCTGGAAGTGC GGCTAC | GGCAGCGTGCACGTGTTT     |
| <i>Rrm2</i>                    | TTGCAGCGAGTGATGGCATA  | CCATGGCAATTTGGAAGCCA   |
| <i>Samm50</i>                  | TTTTGATGGACTTGGGCGGA  | TGAGATCGCCGCATTACCTC   |
| <i>Sbno2</i>                   | AGACATCCCAGACACACCTG  | TGAGAAGTGGAGTGCTGGAG   |
| <i>Slc25a4</i>                 | GGTACTTCCCCACTCAAGCC  | AGCAAAGTAGCGCCAGAACT   |
| <i>Slc25a35</i>                | TAGTCGTGGCAATGACACCC  | TCCAAGATCCCCCGGTACAT   |
| <i>Slc6a19</i>                 | TCCACTCAACCAGAACCAGAC | TGAGTCACTGATGGAAGTGGAG |
| <i>Srxn1</i>                   | CCAGGGTGGCGACTACTACT  | AGGTCTGAAAGGGTGGACCTC  |
| <i>Stard7</i>                  | CTCTACGGCCGCTGTATTC   | CGCCATCAAACAGAGGCAT    |
| <i>Stk19</i>                   | GTCCTCACTGTCCGAGATGC  | CACCATGCTCAGTACAGCCT   |
| <i>Syt7</i>                    | ACTGGGCAAACGCTACAAGA  | TGCAGGCAACTTGATGGCTT   |
| <i>Tbrg4</i>                   | AACGACAGCCGTACATTGGT  | AGCTCCAGGCACTTGCTTTC   |
| <i>Tfam</i>                    | GAGCGTGCTAAAAGCACTGG  | GCTACCCATGCTGGAAAAACA  |
| <i>Tinagl1</i>                 | TTCTTGACCAGCGTGGCAT   | CCCCACCCAGTGATCTTGAC   |
| <i>Tomm5</i>                   | CGGAGGAGATGAAGCGGAAG  | TATGGAGTGA CTGCGAGCAG  |
| <i>Trak2</i>                   | GCTGAAGAGACGTTCCGCTA  | ATCTCGATCCCTCTTGCCA    |
| <i>Trmt61a</i>                 | GCTCCTTCTCTCCGTGCATT  | TGCGCACATTGTAGACCTGT   |
| <i>Trp53inp2</i>               | TACCCCTCCCGCCTGTTTTA  | CTGCCGGTGACATAAACGGA   |
| <i>Ttc7b</i>                   | TGCTCCCCACGATCAAGAAC  | ATCTCCCGACTCCTCTCGTC   |
| <i>Tusc2</i>                   | GCAGTGCCCTCCCTTCGTATT | CTGCCATTCTTGGTGACGA    |
| <i>Twf2</i>                    | TGCTACCTCCTCTCCGACT   | ATAGCATCTT CAGCCGACC   |
| <i>VEGF<math>\alpha</math></i> | CACGACAGAAGGAGAGCAGA  | GGGCTTCATCGTTACAGCAG   |
| <i>Wnt7b</i>                   | TTTCTCTGCTTTGGCGTCCT  | GGCCAGGAATCTTGTGTCAG   |

## **SUPPLEMENTAL REFERENCES**

<sup>1</sup>Liu, G., Ding, W., Liu, X., and Mulder, K.M. (2006). c-Fos is required for TGFbeta1 production and the associated paracrine migratory effects of human colon carcinoma cells. *Mol Carcinog* 45, 582-593
